# Supplementary material for: Non-covalent inhibitors of thioredoxin glutathione reductase with schistosomicidal activity in vivo
Source: PubMed Central journal article supplement (PMC10287695; doi:10.1038/s41467-023-39444-y), 2023-06-22
Supplement: 41467_2023_39444_MOESM3_ESM.pdf [file 41467_2023_39444_MOESM3_ESM.pdf]

## **Description of Additional Supplementary Files**

Filename: Supplementary\_movie\_1.mp4

Description: An analysis of the free energy minima and maxima for the water probe in subpockets A-C using SZMAP and WaterOrientation extension in VIDA. The movie was generated in PyMOL.

Filename: Supplementary\_movie\_2.pptx

Description: Phenotypic assessment of NTS viability upon PZQ exposure for 24 hours at indicated concentration.
